# Supplementary material for: Evaluation of Chitosans as Coagulants—Flocculants to Improve Sand Filtration for Drinking Water Treatment
Source: MDPI journal article supplement (doi:10.3390/ijms24021295), 2023-01-09
Supplement: s1 [file s1]

**Supplemental Table S1:** Average water quality parameters for University Lake over the 57-day study period

| <u>Parameter</u>               | <u>Units</u>           | <u>Average Values (+/- SD)</u> |
|--------------------------------|------------------------|--------------------------------|
| pH                             |                        | 6.87 (+/- 0.228)               |
| Temperature                    | °C                     | 9.90 (+/- 3.40)                |
| Specific Conductance           | mS/cm                  | 0.088 (+/- 0.011)              |
| Conductivity                   | uS/cm                  | 62.70 (+/- 10.25)              |
| Dissolved Oxygen %             | %                      | 98.06 (+/- 14.79)              |
| Dissolved Oxygen Concentration | mg/L                   | 11.12 (+/- 1.75)               |
| Chlorophyll                    | ug/L                   | 10.80 (+/- 8.27)               |
| BGA Phycocyanin                | Cells/mL               | 3385.80 (+/- 1298.36)          |
| Fluoride                       | mg/L                   | <0.10                          |
| Total Coliform                 | MPN/100 mL             | 1762.5 (+/- 2363.7)            |
| <i>E. coli</i>                 | MPN/100 mL             | 112.15 (+/- 155.78)            |
| TOC                            | mg/L                   | 7.11 (+/- 1.615)               |
| UV <sub>254</sub>              | cm <sup>-1</sup>       | 0.225 (+/- 0.048)              |
| DOC                            | mg/L                   | 6.04 (+/- 1.43)                |
| Alkalinity*                    | mg/L CaCO <sub>3</sub> | 19.13 (+/- 2.68)               |

SD = standard deviation

\*Measured from a raw water blend ranging from 15-30% University Lake water
